# Supplementary material
Source: PubMed Central journal article supplement (PMC7423284)
Supplement: rstb20190541supp1.pdf [file rstb20190541supp1.pdf]

## Electronic Supplementary Material

### Adaptive zones shape the magnitude of premating reproductive isolation in *Timema* stick insects

Moritz Muschick<sup>1\*</sup>, Victor Soria-Carrasco<sup>2\*</sup>, Jeffrey L. Feder, Zach Gompert, and Patrik Nosil

\*These authors contributed equally to this work.

Contact: <sup>1</sup>moritz.muschick@eawag.ch ; <sup>2</sup>victor.soria-carrasco@jic.ac.uk

**Table S1.** Populations used in this work for transition rate analyses and host preference experiments. (csv file)

**Table S2.** Host preference experiments. See Table S1 for correspondence between host plant codes and host plant genera. (csv file)

**Table S3.** Phylogenetic hypothesis testing. We used two datasets: using strictly variant sites with ascertainment bias substitution models for inference ('strict-ASC') and including also sites with ambiguities and using substitution standard models for inference ('relaxed'). We tested five hypotheses: clustering by division ('division', implies a single shift between conifers and flowering plants), clustering by species ('species'), clustering by species and division within species ('division within species', minimizes the number of shifts within species), Bayesian inference from Riech *et al.* (2017) ('BEAST'), and maximum-likelihood tree inferred with IQTREE ('free'). We used IQTREE and consel to estimate p-values of Shimodaira-Hasegawa (p-SH), weighted Shimodaira-Hasegawa (p-WSH) and Approximately Unbiased (p-AU) test. The hypotheses rejected are highlighted using bold text.

| Dataset    | No sites | Program | Hypothesis                     | p-SH         | p-WSH        | p-AU         |
|------------|----------|---------|--------------------------------|--------------|--------------|--------------|
| strict-ASC | 5797     | IQTREE  | <b>Division</b>                | <b>0.000</b> | <b>0.000</b> | <b>0.000</b> |
|            |          |         | Species                        | 0.771        | 0.661        | 0.321        |
|            |          |         | <b>division within species</b> | <b>0.008</b> | <b>0.000</b> | <b>0.000</b> |
|            |          |         | BEAST                          | 1.000        | 0.912        | 0.576        |
|            |          |         | Free                           | 0.919        | 0.917        | 0.566        |
|            |          | consel  | <b>Division</b>                | <b>0.000</b> | <b>0.000</b> | <b>0.000</b> |
|            |          |         | Species                        | 0.779        | 0.684        | 0.345        |
|            |          |         | <b>division within species</b> | <b>0.007</b> | <b>0.000</b> | <b>0.000</b> |
|            |          |         | BEAST                          | 0.917        | 0.912        | 0.546        |
|            |          |         | Free                           | 0.911        | 0.915        | 0.576        |
| Relaxed    | 19556    | IQTREE  | <b>Division</b>                | <b>0.000</b> | <b>0.000</b> | <b>0.000</b> |
|            |          |         | Species                        | 0.776        | 0.653        | 0.311        |
|            |          |         | <b>division within species</b> | <b>0.030</b> | <b>0.000</b> | <b>0.000</b> |
|            |          |         | BEAST                          | 0.912        | 0.912        | 0.573        |
|            |          |         | Free                           | 1.000        | 0.921        | 0.579        |
|            |          | consel  | <b>Division</b>                | <b>0.000</b> | <b>0.000</b> | <b>0.000</b> |
|            |          |         | Species                        | 0.775        | 0.660        | 0.314        |
|            |          |         | <b>division within species</b> | <b>0.018</b> | <b>0.000</b> | <b>0.000</b> |
|            |          |         | BEAST                          | 0.903        | 0.855        | 0.494        |
|            |          |         | Free                           | 0.926        | 0.951        | 0.646        |

**Table S4.** Transition rate models support. Each model was fit to 1000 trees from the posterior distribution of time calibrated trees (from Riesch *et al.* 2017) using two methods: joint and marginal and five different root probabilities: same probability for all host genera ('flat'), root probabilities following Yang (2006) ('yang'), root probabilities estimated following Maddison *et al.* (2007) and FitzJohn *et al.* (2009) ('madd'), same probability for all conifer host genera ('con'), and same probability for all flowering plant genera ('flo'). (csv file)

**Table S5.** Transition rate estimates for all models (methods and root probabilities as in Table S4). (csv file)

**Table S6.** Analysis of divergence between pairs of *Timema* population in host preference.

|                                                                    | Predicted mean<br>(model error) preference<br>difference |                                                   | Estimate<br>(logit) | Std.<br>Error | z-value | Pr(> z )      |
|--------------------------------------------------------------------|----------------------------------------------------------|---------------------------------------------------|---------------------|---------------|---------|---------------|
|                                                                    | Both<br>flowering<br>plant hosts                         | One conifer<br>and one<br>flowering<br>plant host |                     |               |         |               |
| <b>1) all pairs<br/>(n=24 pairs)</b>                               |                                                          |                                                   |                     |               |         |               |
| Intercept                                                          |                                                          |                                                   | -1.2501             | 0.2108        | -5.9311 | <0.0001       |
| Host use divergence                                                | 0.22 (0.15)                                              | 0.48 (0.18)                                       | 1.1539              | 0.3294        | 3.5035  | <b>0.0005</b> |
| <b>2) within-species pairs<br/>(n=18 pairs)</b>                    |                                                          |                                                   |                     |               |         |               |
| Intercept                                                          |                                                          |                                                   | -1.2123             | 0.2261        | -5.3609 | 0.0000        |
| Host use divergence                                                | 0.23 (0.16)                                              | 0.60 (0.19)                                       | 1.6260              | 0.5979        | 2.7197  | <b>0.0065</b> |
| <b>3) within-species,<br/>same locality pairs<br/>(n=13 pairs)</b> |                                                          |                                                   |                     |               |         |               |
| Intercept                                                          |                                                          |                                                   | -1.2564             | 0.2947        | -4.2625 | <0.0001       |
| Host use divergence                                                | 0.22 (0.17)                                              | 0.60 (0.20)                                       | 1.6555              | 0.6651        | 2.4890  | <b>0.0128</b> |

**Figure S1.** Support for each model using different root probabilities and either joint estimation of transition rates and ancestral states (A-E) or marginal estimation of rates followed by ancestral state estimation (F-J) (see main text and Fig. 3 for details on models and root priors). Violin plots depict the distribution of  $\Delta\text{AICc}$  values (difference in sample-size corrected AIC between the focal model and the best model) after fitting the models by maximum likelihood to 1000 trees randomly taken from the posterior distribution from Riesch *et al.* (2017).

joint

**A** flat

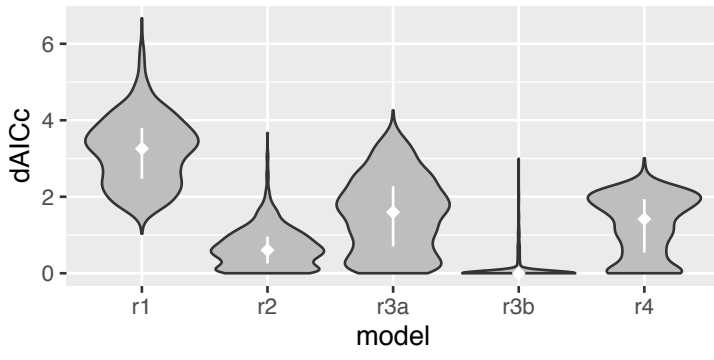

**B** yang

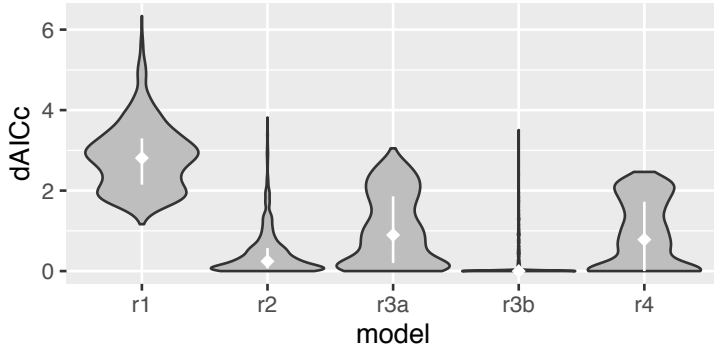

**C** madd

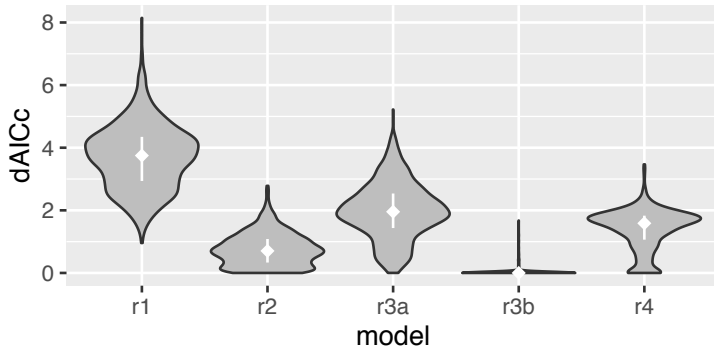

**D** con

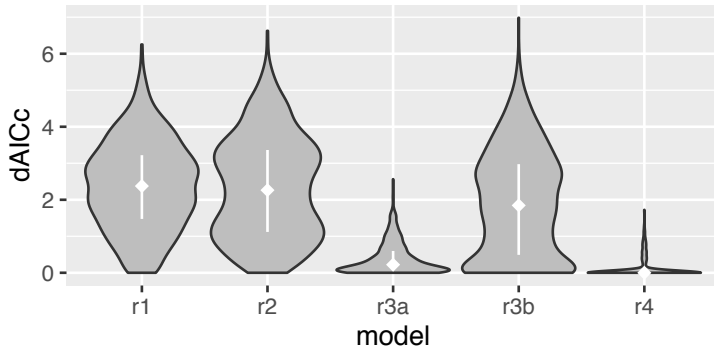

**E** flo

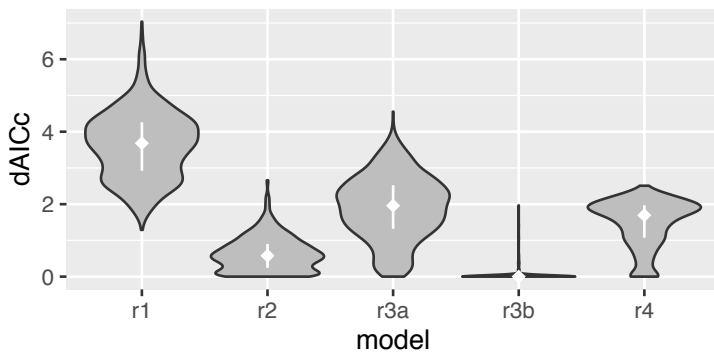

marginal

**F** flat

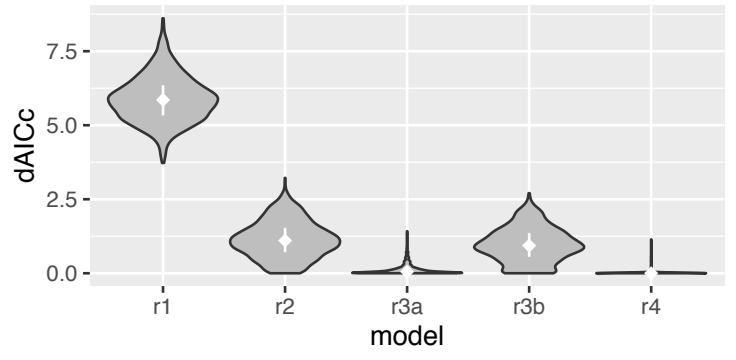

**G** yang

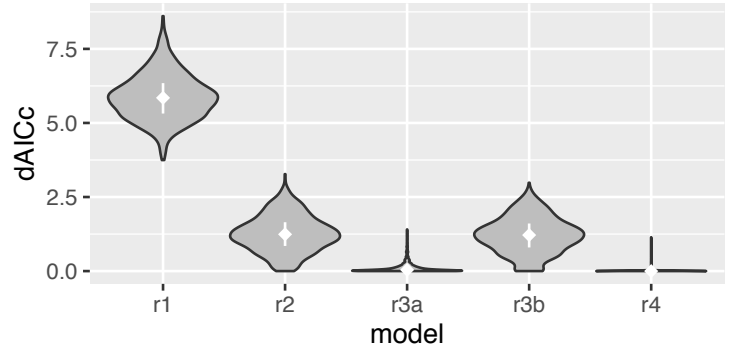

**H** madd

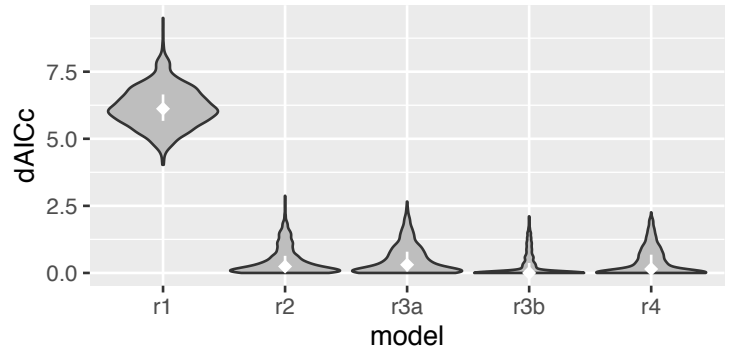

**I** con

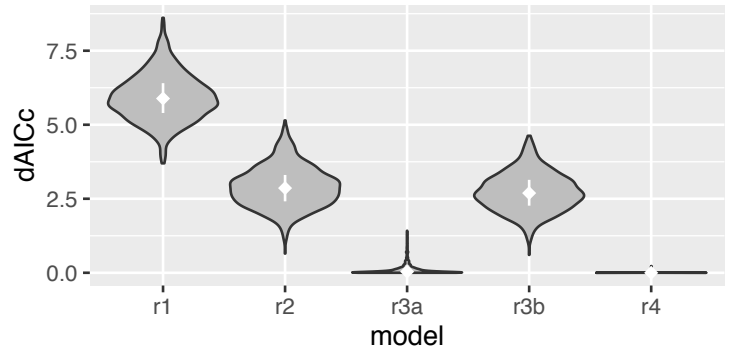

**J** flo

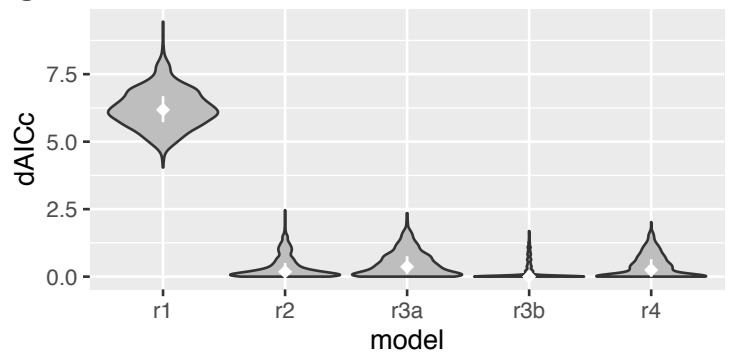

**Figure S2.** Distribution of transition rates for each model and root probability using joint estimation of transition rates and ancestral states (see main text and Figure 3 for details).

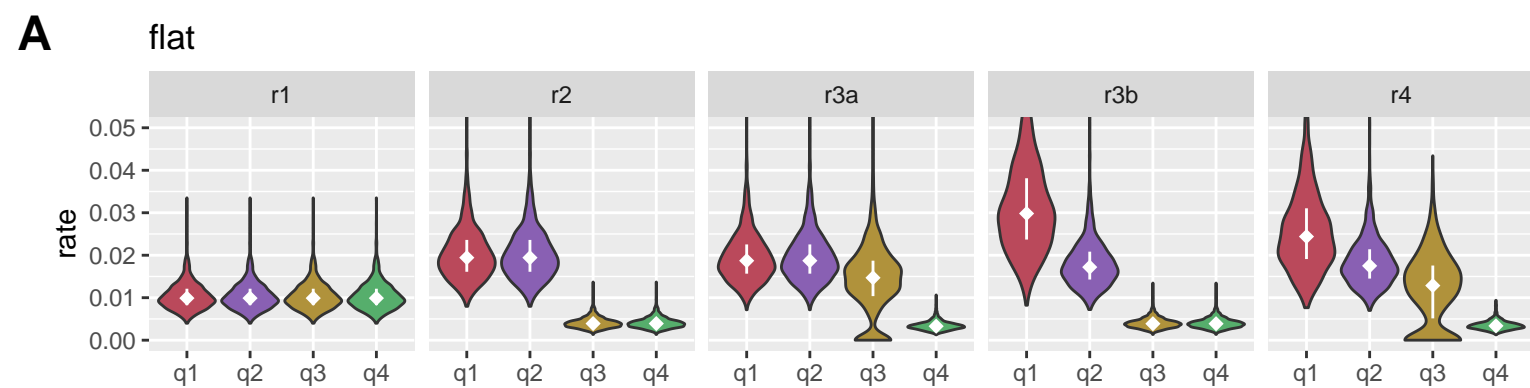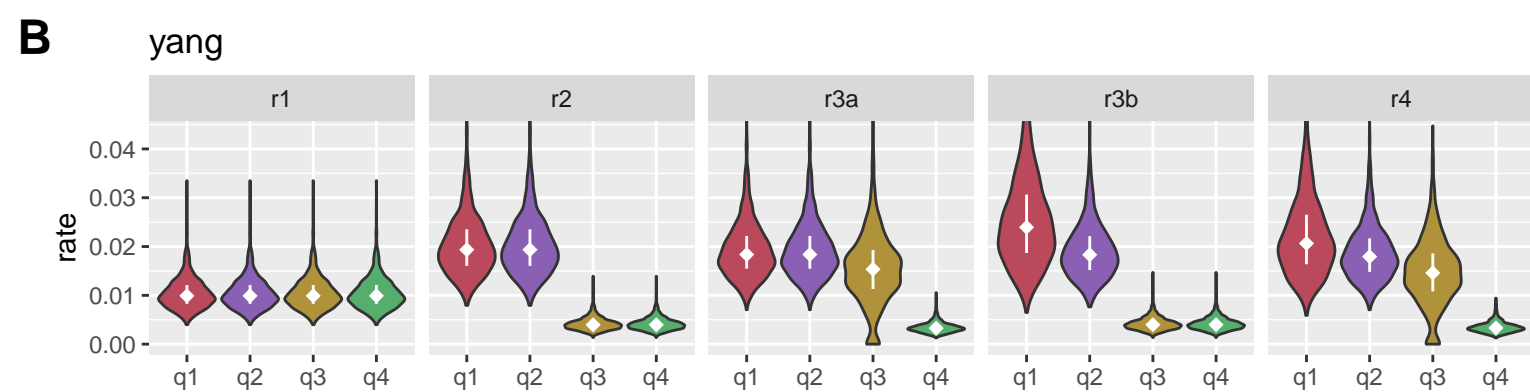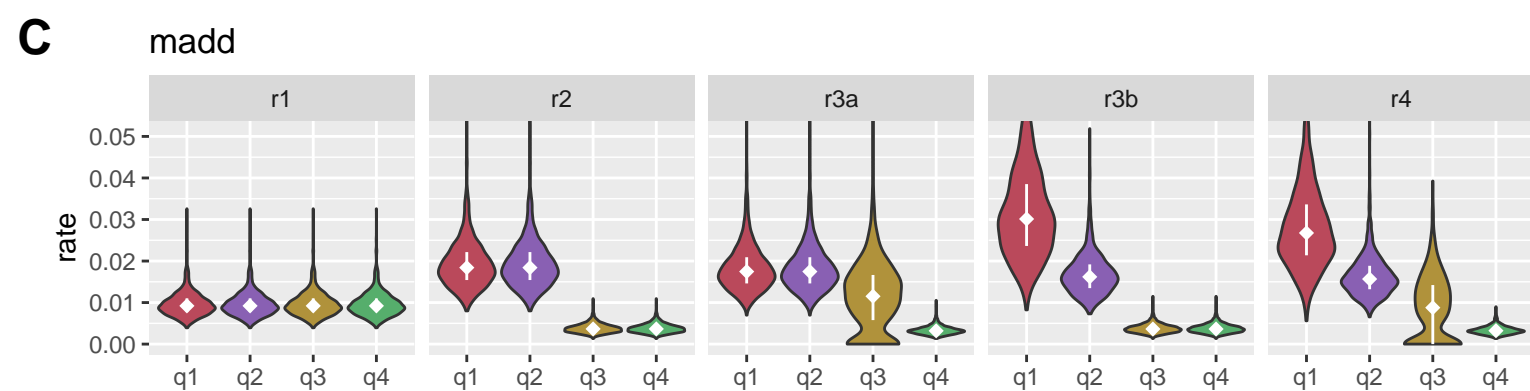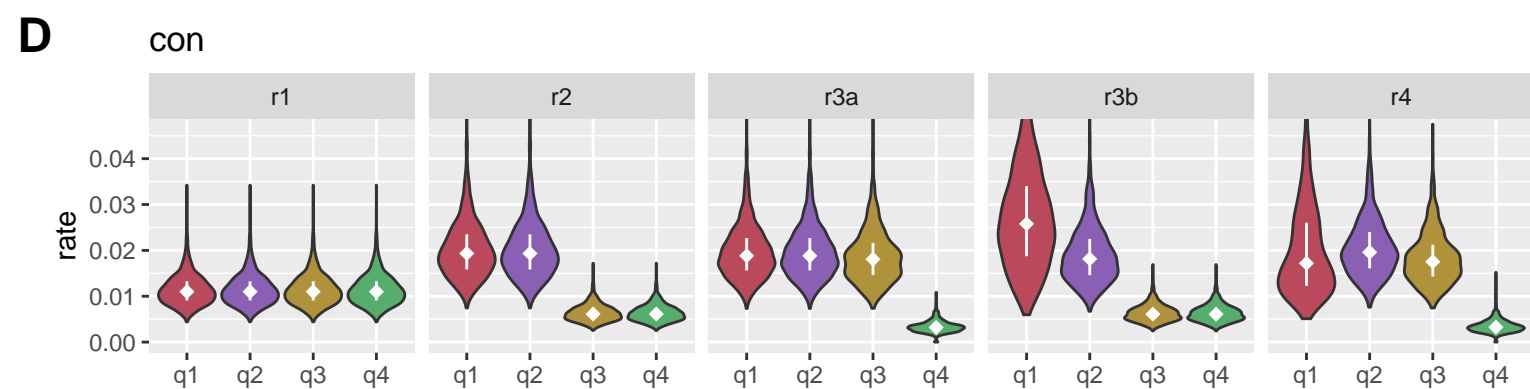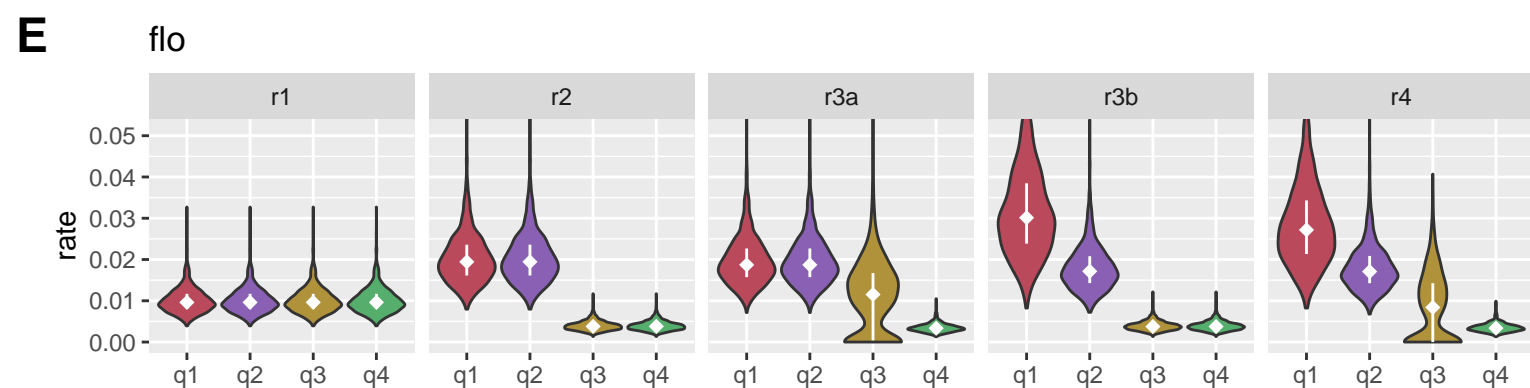

**Figure S3.** Distribution of transition rates for each model and root probability using marginal estimation of transition rates (see main text and Figure 3 for details).

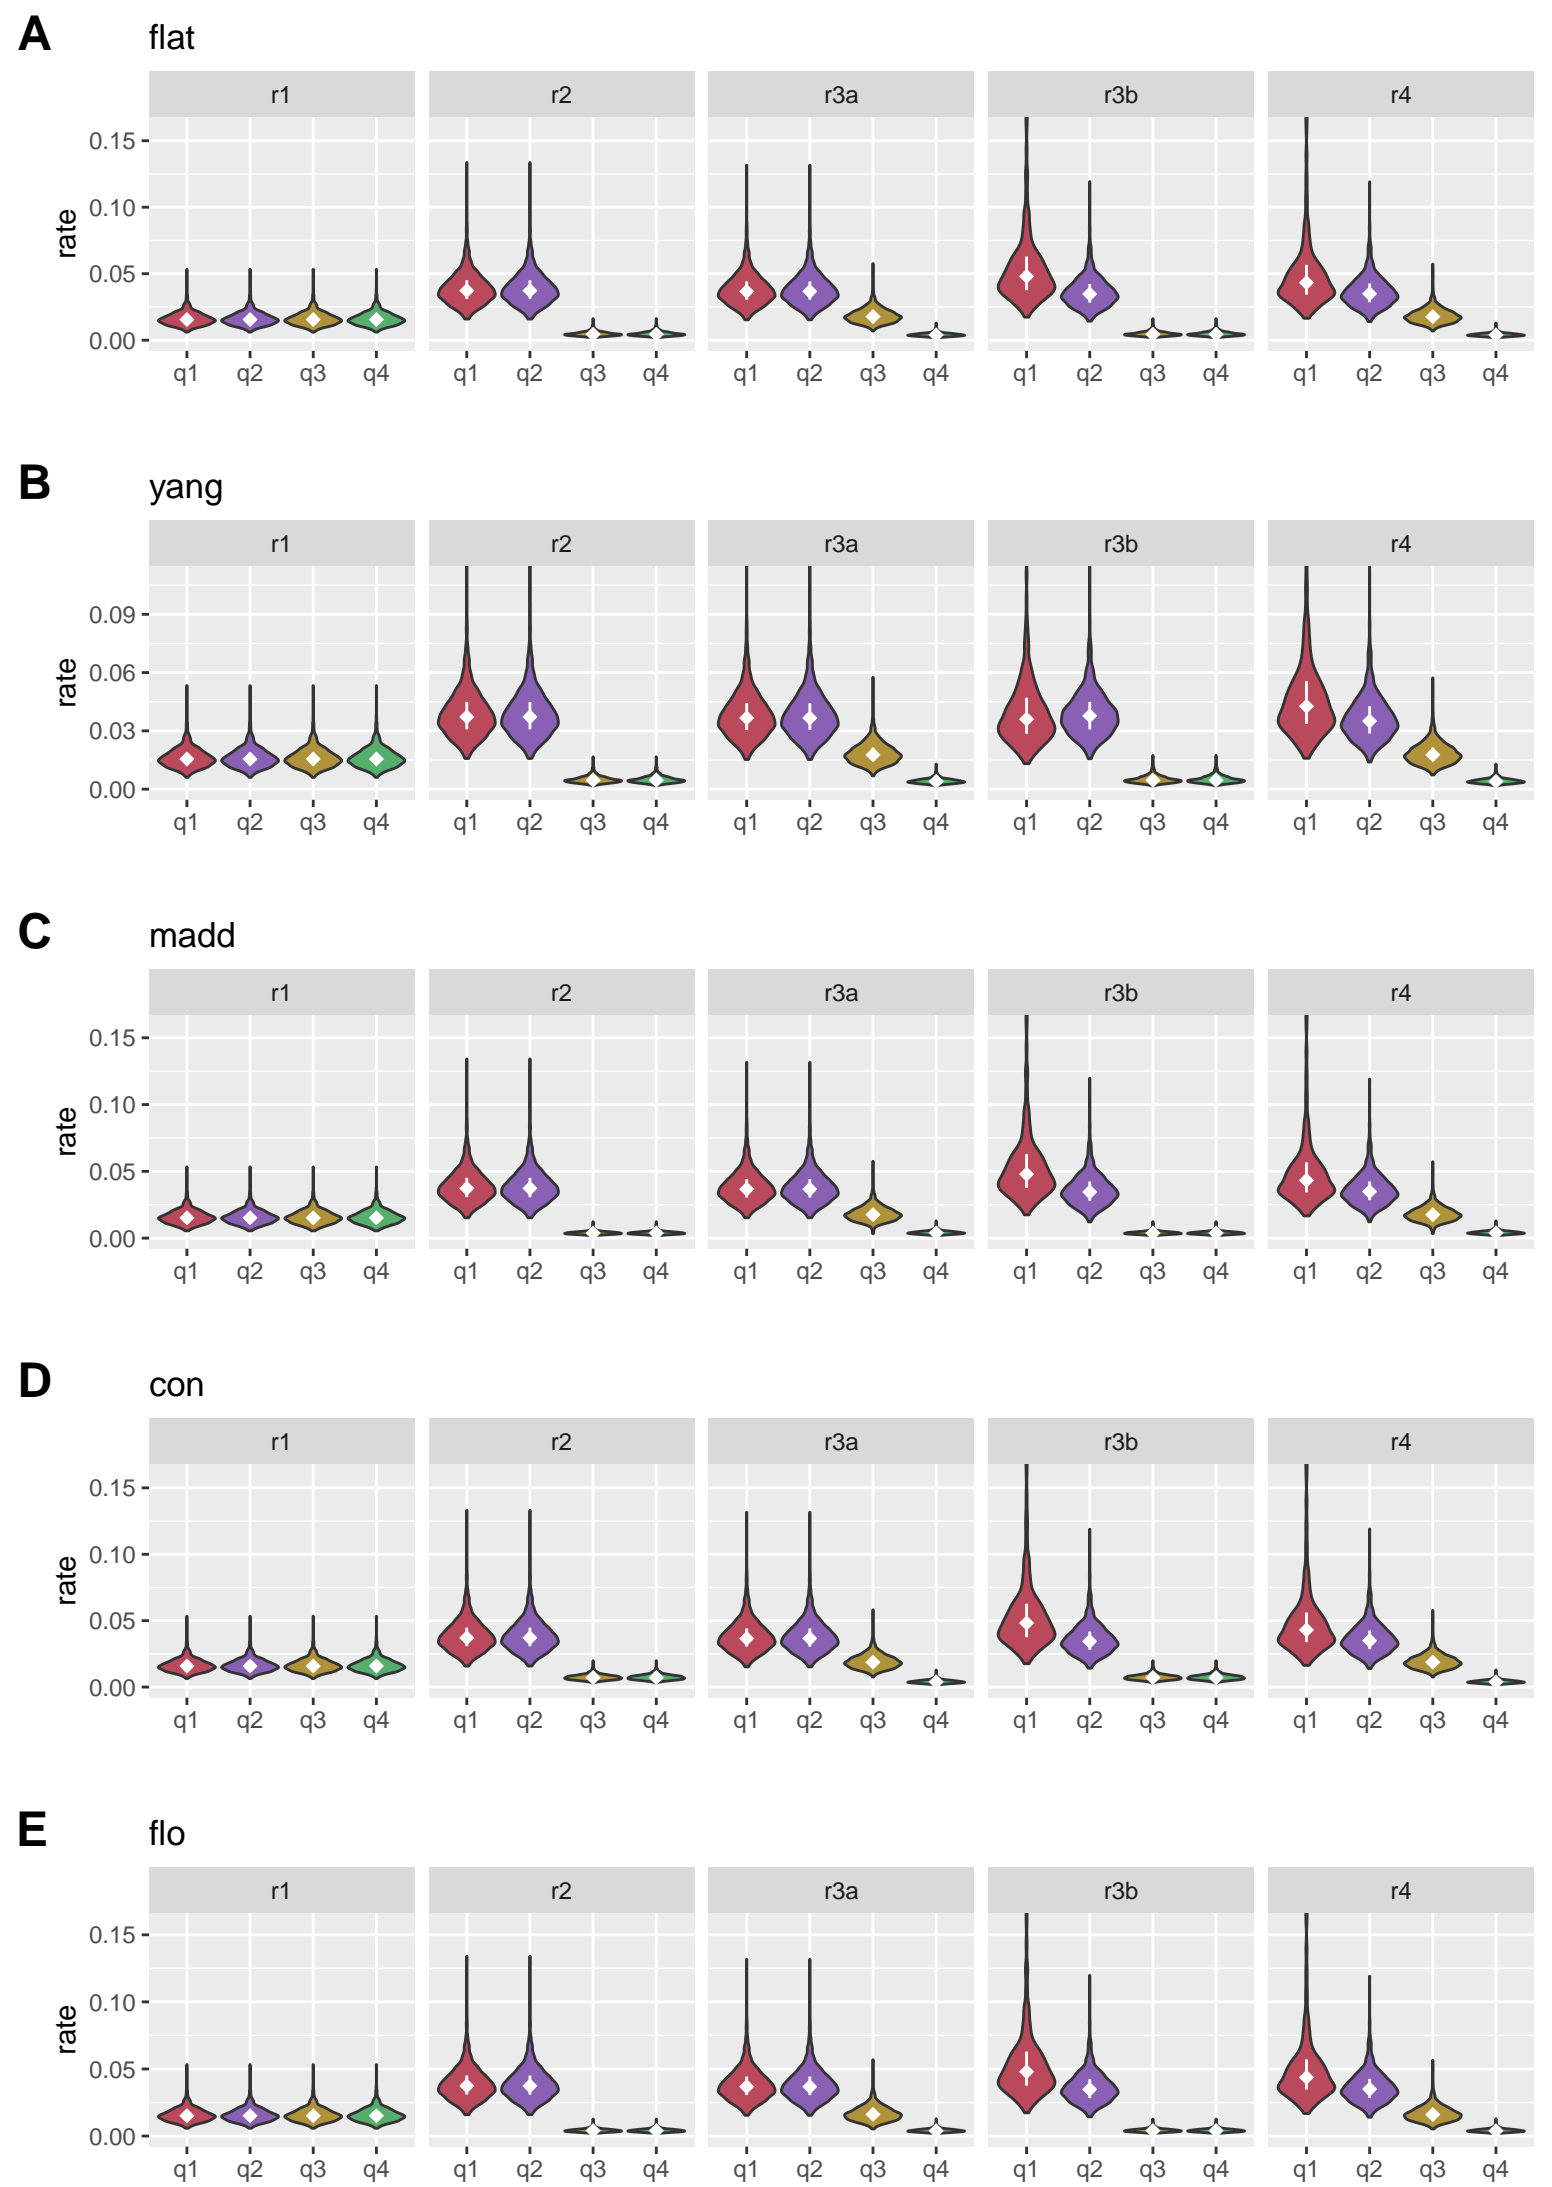



## References

- FitzJohn, Richard G., Wayne P. Maddison, and Sarah P. Otto. 2009. 'Estimating Trait-Dependent Speciation and Extinction Rates from Incompletely Resolved Phylogenies'. *Systematic Biology* 58 (6): 595–611. <https://doi.org/10.1093/sysbio/syp067>.
- Maddison, Wayne P, Peter E Midford, and Sarah P Otto. 2007. 'Estimating a Binary Character's Effect on Speciation and Extinction'. *Systematic Biology* 56 (5): 701–10.
- Riesch, Rüdiger, Moritz Muschick, Dorothea Lindtke, Romain Villoutreix, Aaron A. Comeault, Timothy E. Farkas, Kay Lucek, et al. 2017. 'Transitions between Phases of Genomic Differentiation during Stick-Insect Speciation'. *Nature Ecology & Evolution* 1 (February): 0082. <https://doi.org/10.1038/s41559-017-0082>.
- Yang, Ziheng. 2006. 'Bayesian Methods'. In *Computational Molecular Evolution*, 145–84. Oxford: Oxford University Press.
